# Supplementary material for: WHO European Childhood Obesity Surveillance Initiative: School Nutrition Environment and Body Mass Index in Primary Schools
Source: MDPI journal article supplement (doi:10.3390/ijerph111111261), 2014-10-30
Supplement: s1 [file s1]

## WHO European Childhood Obesity Surveillance Initiative: School Nutrition Environment and Body Mass Index in Primary Schools

**Table S1.** School sampling characteristics and number of children measured per school in COSI rounds 1 (2007/2008) and 2 (2009/2010), by country.

| Characteristics                                    | BGR                        |   | CZE   |       | GRC |     | HUN |     | IRL |     | LVA |     | LTU |     | MLT |   | NOR |     | PRT |       | SVN   |         | SWE |   |
|----------------------------------------------------|----------------------------|---|-------|-------|-----|-----|-----|-----|-----|-----|-----|-----|-----|-----|-----|---|-----|-----|-----|-------|-------|---------|-----|---|
|                                                    | COSI Data Collection Round |   |       |       |     |     |     |     |     |     |     |     |     |     |     |   |     |     |     |       |       |         |     |   |
|                                                    | 1                          | 2 | 1     | 2 *   | 1   | 2   | 1   | 2   | 1   | 2 † | 1   | 2 * | 1   | 2 † | 1   | 2 | 1   | 2 † | 1 ‡ | 2 †,‡ | 1     | 2 *     | 1   | 2 |
| Targeted age groups                                | 7                          | – | 7     | 7     | –   | 7,9 | –   | 7   | 7   | 7,9 | 7   | 7   | 7   | 7,9 | 6   | – | 8   | 8   | 7   | 7     | 6,7,8 | 6,7,8,9 | 7,8 | – |
| Schools                                            |                            |   |       |       |     |     |     |     |     |     |     |     |     |     |     |   |     |     |     |       |       |         |     |   |
| Sampled (n)                                        | 184                        | – | NA §  | NA §  | –   | 150 | –   | 164 | 498 | 192 | 193 | 174 | 161 | 164 | 95  | – | 131 | 131 | 185 | 185   | 118   | 167     | 220 | – |
| Participated in weight and height measurements (n) | 184                        | – | 543 § | 882 § | –   | 120 | –   | 98  | 163 | 154 | 190 | 169 | 155 | 162 | 95  | – | 127 | 125 | 177 | 172   | 118   | 167     | 94  | – |
| Completed a school form (n)                        | 179                        | – | 548 § | 882 § | –   | 123 | –   | 98  | 154 | 154 | 190 | 169 | 155 | 160 | 95  | – | 127 | 125 | 176 | 167   | 118   | 167     | 89  | – |
| Children Measured in a School                      |                            |   |       |       |     |     |     |     |     |     |     |     |     |     |     |   |     |     |     |       |       |         |     |   |
| Median (n)                                         | 19                         | – | 1 §   | 1 §   | –   | 41  | –   | 12  | 18  | 24  | 16  | 15  | 29  | 55  | 29  | – | 23  | 20  | 18  | 21    | 99    | 90      | 40  | – |
| Minimum (n)                                        | 2                          | – | 1 §   | 1 §   | –   | 1   | –   | 1   | 2   | 2   | 2   | 1   | 8   | 12  | 3   | – | 2   | 1   | 1   | 2     | 33    | 7       | 11  | – |
| Maximum (n)                                        | 43                         | – | 29 §  | 31 §  | –   | 169 | –   | 34  | 32  | 60  | 99  | 115 | 79  | 170 | 104 | – | 108 | 85  | 50  | 55    | 172   | 228     | 131 | – |

Notes: –, no participation; BGR, Bulgaria; COSI, Childhood Obesity Surveillance Initiative; CZE, Czech Republic; GRC, Greece; HUN, Hungary; IRL, Ireland; LTU, Lithuania; LVA, Latvia; MLT, Malta; NA, not applicable; NOR, Norway; PRT, Portugal; SVN, Slovenia; SWE, Sweden; The country codes refer to the International Organization for Standardization (ISO) 3166-1 Alpha-3 country codes; \* Country participated in both COSI rounds and a new sample of schools was included in round 2; † Country participated in both COSI rounds and the same schools as in round 1 were included in round 2; ‡ Data from four schools in Madeira, collected one year after the other Portuguese regions, were not taken into account in this paper; § The primary sampling unit were paediatric clinics and not primary schools. The schools of the measured children were, however, asked to complete the school form.

**Table S2.** Data collection period of the anthropometric measurements and the completion of the school form in COSI rounds 1 (2007/2008) and 2 (2009/2010), by country.

| Country        | Data Collection Period (Month/Year) |             |                           |             |
|----------------|-------------------------------------|-------------|---------------------------|-------------|
|                | Anthropometric Measurements         |             | Completion of School Form |             |
|                | Round 1                             | Round 2     | Round 1                   | Round 2     |
| Bulgaria       | 03/08–06/08                         | –           | NA                        | –           |
| Czech Republic | 01/08–12/08                         | 01/10–12/10 | 01/08–09/09               | 01/10–03/11 |
| Greece         | –                                   | 11/10–03/11 | –                         | 11/10–03/11 |
| Hungary        | –                                   | 04/10–06/10 | –                         | 04/10–06/10 |
| Ireland        | 04/08–06/08                         | 10/10–11/10 | 04/08–09/08               | 10/10–11/10 |
| Latvia         | 02/08–03/08                         | 03/10–04/10 | 02/08–03/08               | 03/10–04/10 |
| Lithuania      | 04/08–05/08                         | 02/10–05/10 | 03/08–05/08               | 03/10–05/10 |
| Malta          | 04/08–06/08                         | –           | 04/08–08/08               | –           |
| Norway         | 09/08–11/08                         | 09/10–12/10 | 09/08–11/08               | 09/10–12/10 |
| Portugal       | 05/08–06/08                         | 04/10–12/10 | 05/08–07/08               | 05/10–12/10 |
| Slovenia       | 04/08–04/08                         | 04/10–04/10 | 12/08–12/08               | 05/10–05/10 |
| Sweden         | 03/08–06/08                         | –           | 03/08–11/08               | –           |

Notes: –, no participation; NA, not available.

**Table S3.** Number of schools that completed a school form in COSI rounds 1 (2007/2008) and 2 (2009/2010), by total number of mandatory school environment characteristics for which information was provided and country.

| Total Number of<br>Mandatory School<br>Environment<br>Characteristics for<br>Which Information<br>was Provided | BGR                            |   | CZE            |                | GRC |                | HUN |                | IRL |                | LVA |                | LTU            |                | MLT |   | NOR            |                | PRT            |                | SVN            |     | SWE            |   |
|----------------------------------------------------------------------------------------------------------------|--------------------------------|---|----------------|----------------|-----|----------------|-----|----------------|-----|----------------|-----|----------------|----------------|----------------|-----|---|----------------|----------------|----------------|----------------|----------------|-----|----------------|---|
|                                                                                                                | COSI Data Collection Round     |   |                |                |     |                |     |                |     |                |     |                |                |                |     |   |                |                |                |                |                |     |                |   |
|                                                                                                                | 1 <sup>a</sup>                 | 2 | 1 <sup>b</sup> | 2 <sup>c</sup> | 1   | 2 <sup>d</sup> | 1   | 2 <sup>e</sup> | 1   | 2 <sup>f</sup> | 1   | 2 <sup>g</sup> | 1 <sup>h</sup> | 2 <sup>i</sup> | 1   | 2 | 1 <sup>j</sup> | 2 <sup>k</sup> | 1 <sup>l</sup> | 2 <sup>m</sup> | 1 <sup>n</sup> | 2   | 1 <sup>o</sup> | 2 |
|                                                                                                                | Number of Schools ( <i>n</i> ) |   |                |                |     |                |     |                |     |                |     |                |                |                |     |   |                |                |                |                |                |     |                |   |
| <13                                                                                                            | 0                              | – | 0              | 0              | –   | 0              | –   | 0              | 0   | 0              | 0   | 0              | 0              | 0              | 0   | – | 0              | 0              | 0              | 0              | 0              | 0   | 0              | – |
| 13                                                                                                             | 0                              | – | 0              | 0              | –   | 0              | –   | 0              | 0   | 0              | 0   | 0              | 0              | 0              | 0   | – | 1              | 1              | 0              | 0              | 0              | 0   | 0              | – |
| 14                                                                                                             | 0                              | – | 0              | 0              | –   | 0              | –   | 0              | 0   | 0              | 0   | 0              | 0              | 0              | 0   | – | 0              | 0              | 0              | 0              | 0              | 0   | 0              | – |
| 15                                                                                                             | 0                              | – | 109            | 381            | –   | 14             | –   | 0              | 0   | 0              | 0   | 0              | 1              | 3              | 0   | – | 0              | 0              | 0              | 0              | 0              | 0   | 0              | – |
| 16                                                                                                             | 5                              | – | 6              | 20             | –   | 1              | –   | 1              | 0   | 1              | 0   | 1              | 9              | 9              | 0   | – | 0              | 0              | 6              | 2              | 0              | 0   | 47             | – |
| 17                                                                                                             | 13                             | – | 14             | 33             | –   | 7              | –   | 4              | 0   | 10             | 0   | 2              | 14             | 27             | 0   | – | 7              | 6              | 14             | 6              | 5              | 0   | 5              | – |
| 18                                                                                                             | 161                            | – | 419            | 448            | –   | 101            | –   | 93             | 154 | 143            | 190 | 166            | 131            | 121            | 95  | – | 119            | 118            | 156            | 159            | 113            | 167 | 37             | – |

Notes: –, no participation; BGR, Bulgaria; COSI, Childhood Obesity Surveillance Initiative; CZE, Czech Republic; GRC, Greece; HUN, Hungary; IRL, Ireland; LTU, Lithuania; LVA, Latvia; MLT, Malta; NOR, Norway; PRT, Portugal; SVN, Slovenia; SWE, Sweden; The country codes refer to the International Organization for Standardization (ISO) 3166-1 Alpha-3 country codes; <sup>a</sup> Information was not provided by some schools on the characteristics “availability of outside playgrounds or inside play areas where children can play during school breaks” ( $n = 2$ ), “provision of physical education to pupils from participating classes” ( $n = 7$ ) and “any initiatives/projects organized to promote a healthy lifestyle among pupils from participating classes” ( $n = 14$ ); <sup>b</sup> Information was not provided by some schools on the characteristics “availability of outside playgrounds or inside play areas where children can play during school breaks” ( $n = 117$ ), “provision of physical education to pupils from participating classes” ( $n = 120$ ) and “any initiatives/projects organized to promote a healthy lifestyle among pupils from participating classes” ( $n = 116$ ); <sup>c</sup> Information was not provided by some schools on the characteristics “availability of outside playgrounds or inside play areas where children can play during school breaks” ( $n = 395$ ), “provision of physical education to pupils from participating classes” ( $n = 409$ ) and “any initiatives/projects organized to promote a healthy lifestyle among pupils from participating classes” ( $n = 412$ ); <sup>d</sup> Information was not provided by some schools on the characteristics “availability of outside playgrounds or inside play areas where children can play during school breaks” ( $n = 17$ ), “provision of physical education to pupils from participating classes” ( $n = 15$ ) and “any initiatives/projects organized to promote a healthy lifestyle among pupils from participating classes” ( $n = 19$ ); <sup>e</sup> Information was not provided by some schools on the characteristics “availability of outside playgrounds or inside play areas where children can play during school breaks” ( $n = 1$ ), “provision of physical education to pupils from participating classes” ( $n = 2$ ) and “any initiatives/projects organized to promote a healthy lifestyle among pupils from participating classes” ( $n = 3$ ); <sup>f</sup> Information was not provided by some schools on the characteristics “salted snacks can be obtained on the school premises” ( $n = 1$ ), “availability of outside playgrounds or inside play areas where children can play

during school breaks” ( $n = 8$ ), “provision of physical education to pupils from participating classes” ( $n = 2$ ) and “any initiatives/projects organized to promote a healthy lifestyle among pupils from participating classes” ( $n = 1$ ); <sup>g</sup> Information was not provided by some schools on the characteristics “availability of outside playgrounds or inside play areas where children can play during school breaks” ( $n = 2$ ) and “any initiatives/projects organized to promote a healthy lifestyle among pupils from participating classes” ( $n = 2$ ); <sup>h</sup> Information was not provided by some schools on the characteristics “availability of outside playgrounds or inside play areas where children can play during school breaks” ( $n = 2$ ), “provision of physical education to pupils from participating classes” ( $n = 9$ ) and “any initiatives/projects organized to promote a healthy lifestyle among pupils from participating classes” ( $n = 24$ ); <sup>i</sup> Information was not provided by some schools on the characteristics “availability of outside playgrounds or inside play areas where children can play during school breaks” ( $n = 17$ ), “provision of physical education to pupils from participating classes” ( $n = 14$ ) and “any initiatives/projects organized to promote a healthy lifestyle among pupils from participating classes” ( $n = 23$ ); <sup>j</sup> Information was not provided by some schools on the characteristics “cold drinks without sugar can be obtained on the school premises” ( $n = 1$ ), “cold drinks containing sugar can be obtained on the school premises” ( $n = 1$ ), “hot drinks without sugar can be obtained on the school premises” ( $n = 1$ ), “hot drinks containing sugar can be obtained on the school premises” ( $n = 1$ ), “diet or ‘light’ soft drinks can be obtained on the school premises” ( $n = 1$ ), “provision of physical education to pupils from participating classes” ( $n = 1$ ) and “any initiatives/projects organized to promote a healthy lifestyle among pupils from participating classes” ( $n = 6$ ); <sup>k</sup> Information was not provided by some schools on the characteristics “cold drinks without sugar can be obtained on the school premises” ( $n = 1$ ), “cold drinks containing sugar can be obtained on the school premises” ( $n = 1$ ), “hot drinks without sugar can be obtained on the school premises” ( $n = 1$ ), “hot drinks containing sugar can be obtained on the school premises” ( $n = 1$ ), “diet or ‘light’ soft drinks can be obtained on the school premises” ( $n = 1$ ), “provision of physical education to pupils from participating classes” ( $n = 5$ ) and “any initiatives/projects organized to promote a healthy lifestyle among pupils from participating classes” ( $n = 1$ ); <sup>l</sup> Information was not provided by some schools on the characteristics “availability of outside playgrounds or inside play areas where children can play during school breaks” ( $n = 4$ ), “provision of physical education to pupils from participating classes” ( $n = 14$ ) and “any initiatives/projects organized to promote a healthy lifestyle among pupils from participating classes” ( $n = 8$ ); <sup>m</sup> Information was not provided by some schools on the characteristics “availability of outside playgrounds or inside play areas where children can play during school breaks” ( $n = 2$ ), “provision of physical education to pupils from participating classes” ( $n = 3$ ) and “any initiatives/projects organized to promote a healthy lifestyle among pupils from participating classes” ( $n = 5$ ); <sup>n</sup> Information was not provided by some schools on the characteristics “fresh fruit can be obtained on the school premises” ( $n = 2$ ), “diet or ‘light’ soft drinks can be obtained on the school premises” ( $n = 1$ ), “availability of outside playgrounds or inside play areas where children can play during school breaks” ( $n = 1$ ) and “any initiatives/projects organized to promote a healthy lifestyle among pupils from participating classes” ( $n = 1$ ); <sup>o</sup> Information was not provided by some schools on the characteristics “flavoured milk can be obtained on the school premises” ( $n = 1$ ), “availability of outside playgrounds or inside play areas where children can play during school breaks” ( $n = 1$ ), “provision of physical education to pupils from participating classes” ( $n = 47$ ) and “any initiatives/projects organized to promote a healthy lifestyle among pupils from participating classes” ( $n = 50$ ).
